## Sleep insufficiency and incidence of cardiovascular disease among adults in Greece

Fountoulakis PN.<sup>1</sup>; Terzoudi A.<sup>2</sup>; Tsiptsios D.<sup>3</sup>; Triantafyllis AS.<sup>1</sup>; Matziridis A.<sup>4</sup>; Leontidou E.<sup>4</sup>; Manolis A.<sup>4</sup>; Tsamakis K.<sup>5</sup>; Ouranidis A.<sup>6</sup>; Steiropoulos P.<sup>7</sup>; Vorvolakos T.<sup>8</sup>; Tripsianis G.<sup>4</sup>

<sup>1</sup>Asklepeion General Hospital, Department of Cardiology, Athens, Greece

<sup>2</sup>Medical School, Democritus University of Thrace, Department of Neurology, Alexandroupolis, Greece

<sup>3</sup>South Tyneside & Sunderland NHS Foundation Trust, Neurophysiology Department, Sunderland, United Kingdom of Great Britain & Northern Ireland

<sup>4</sup>Medical School, Democritus University of Thrace, Laboratory of Medical Statistics, Alexandroupolis, Greece

<sup>5</sup> King's College London, Institute of Psychiatry, Psychology and Neuroscience., London, United Kingdom of Great Britain & Northern Ireland

<sup>6</sup>Aristotle University of Thessaloniki, School of Chemical Engineering, Thessaloniki, Greece

<sup>7</sup>Medical School, Democritus University of Thrace, Department of Psychiatry, Alexandroupolis, Greece

<sup>8</sup>Medical School, Democritus University of Thrace, Department of Pneumology, Alexandroupolis, Greece

**Funding Acknowledgements:** Type of funding sources: None.

**Introduction:** Sleep disorders are an increasing and modifiable risk factor for cardiovascular disease (CVD).

**Purpose:** The aim of our study was to investigate potential associations between sleep insufficiency and incident CVD.

**Methods:** In this cross-sectional study, 957 participants, (mean age  $49.62 \pm 14.79$ ) from the region of Thrace, Greece were enrolled and classified into three groups [short (<6 h), normal (6-8 h) and long (>8 h) sleep duration]. CVD was assessed by a positive response to the following questions: "Have you been told by a doctor that you have had a heart attack or angina (chest pain or exertion that is relieved by medication)?" or "Have you been told by a doctor that you have had a stroke?". Participants' sleep quality was estimated with the Epworth Sleepiness Scale, Athens Insomnia Scale, Pittsburgh Sleep Quality Index, and Berlin Questionnaire.

**Results:** The overall prevalence of CVD was 9.5%. The population with CVD exhibited reduced sleep duration and efficiency reduced by 33 min and 10%, respectively. After adjusting for all possible cofounders, short sleep duration was 3.07-times more frequent in patients with CVD and sleep duration of less than 5:33 hours could be a potential risk factor for CVD, especially among females. Additionally, CVD was significantly associated with excessive increased daytime sleepiness, insomnia, poor sleep quality and increased risk of obstructive sleep apnea.

**Conclusion(s):** Our study depicts a strong correlation of sleep insufficiency with CVD and promotes early pharmacological or cognitive behavioral interventions in order to protect cardiovascular health.

Abstract Figure. Results

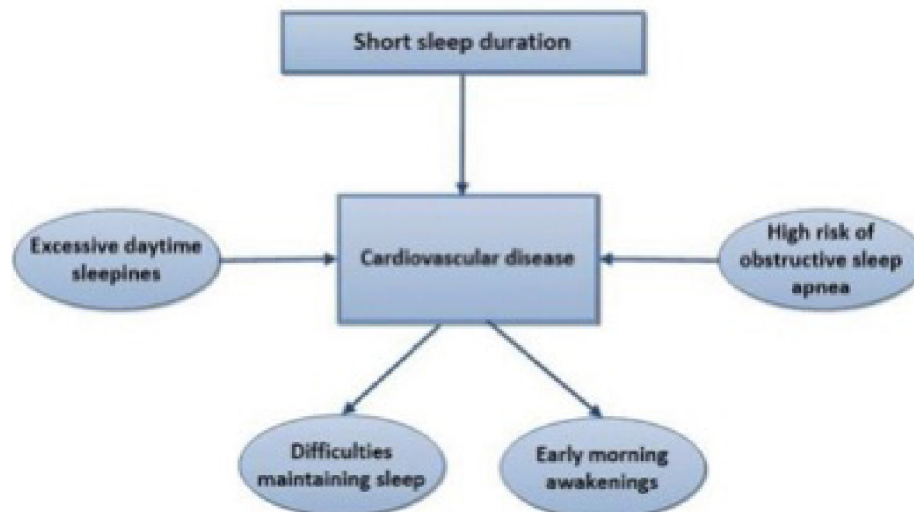

Source: http://academic.oup.com/eurjpc/article-pdf/28/Supplement_1/zwab061.204/37909142/zwab061.204.pdf
